# Supplementary figures and images for: Turning up the heat: heat stress induces markers of programmed cell death in Plasmodium falciparum in vitro
Source: PubMed Central journal article supplement — Cell Death Dis. 2013 Dec 19;4(12):e971–. doi: 10.1038/cddis.2013.505 (PMC3877572; doi:10.1038/cddis.2013.505), 2013-12-19

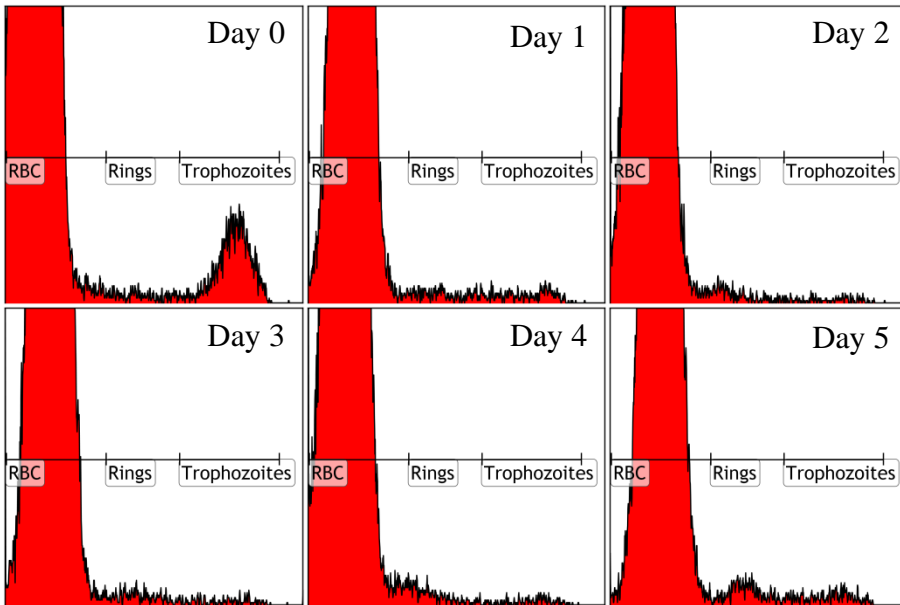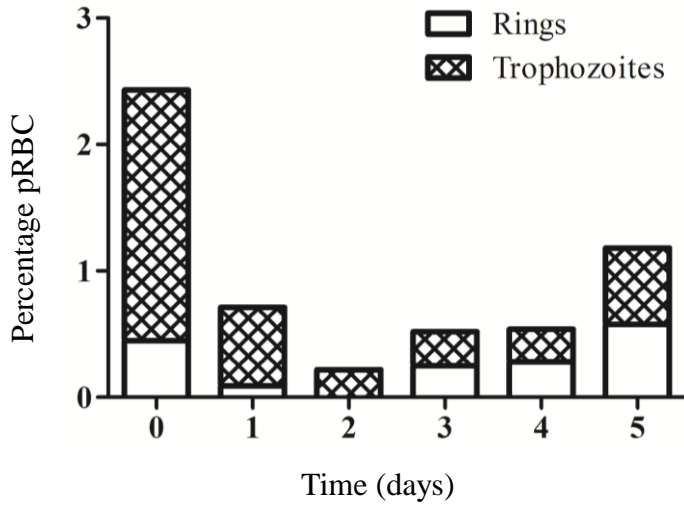

Supplement: cddis2013505x1.pdf [file cddis2013505x1.pdf]
